# Supplementary material for: The Evolution, Spread and Global Threat of H6Nx Avian Influenza Viruses
Source: MDPI journal article supplement (doi:10.3390/v12060673), 2020-06-22
Supplement: s1 [file s1]

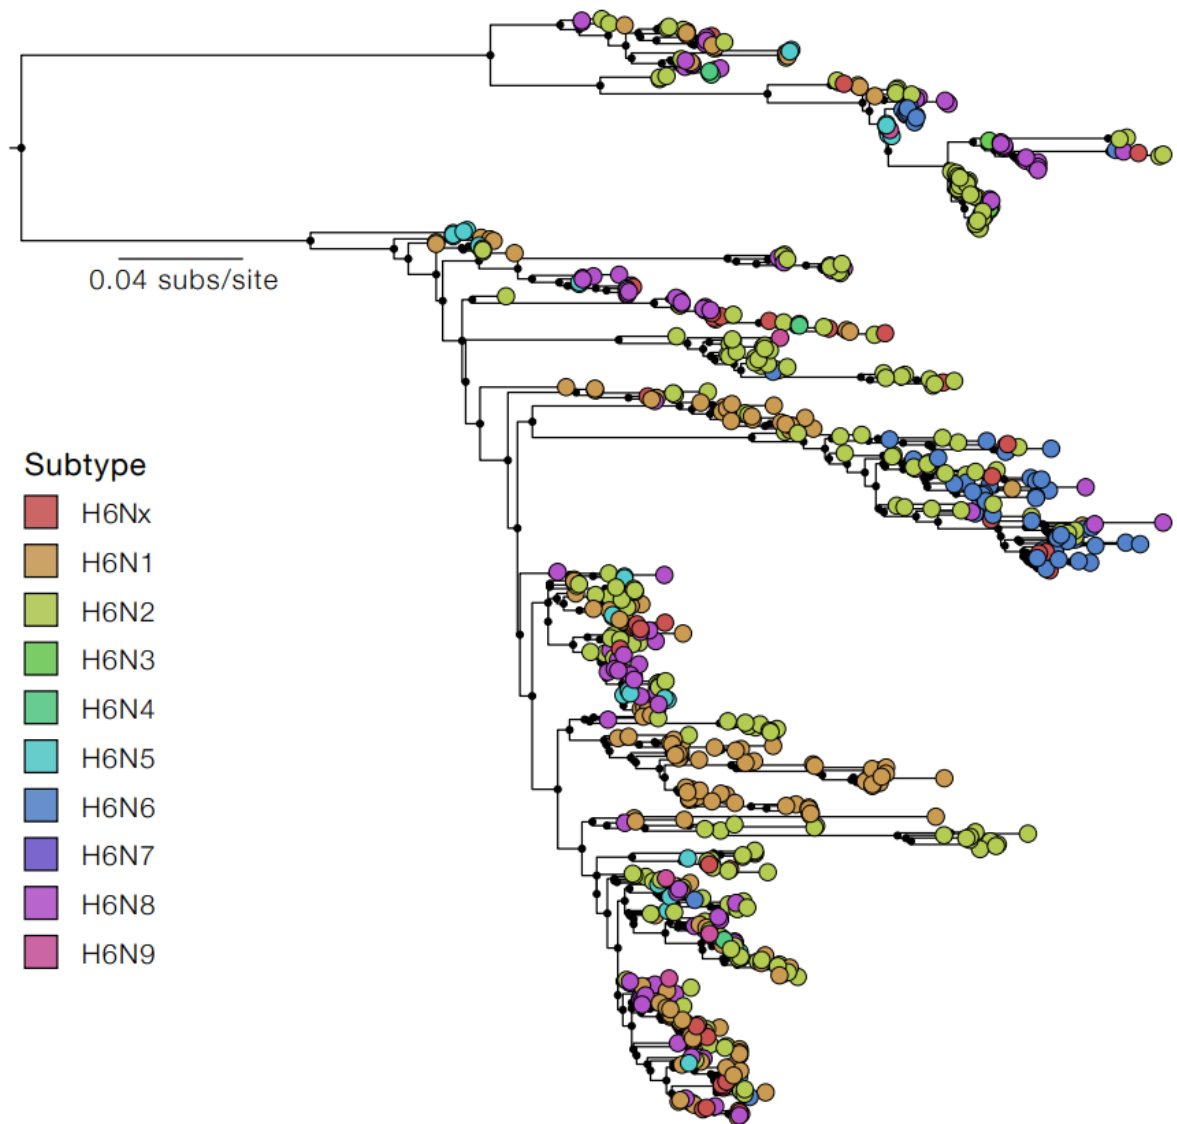

**Supplementary Figure 1:** Phylogeny of H6 segments as Figure 4, but with tips coloured by NA type of that virus.
